# Supplementary material for: The DEAD-box RNA helicase Dhx15 controls glycolysis and arbovirus replication in Aedes aegypti mosquito cells
Source: PubMed Central journal article supplement (PMC9731432; doi:10.1371/journal.ppat.1010694), 2022-11-28
Supplement: ppat.1010694.s012.pdf [file ppat.1010694.s012.pdf]

### **Response to the Reviewer**

Thank you for the positive feedback on our revised manuscript "*The DEAD-box RNA helicase Dhx15 controls glycolysis and arbovirus replication in Aedes aegypti mosquito cells*", written by Samara Rosendo Machado et al. Below find our response to the final reviewer's comment:

#### **Reviewer #3**

**Comment:** The authors should add the new in vivo data in the result section.

**Response:** We have included the in vivo data in figure S6 and adapted the text of the manuscript accordingly.
